# Supplementary material for: Effects of Bofu-Tsusho-San on Diabetes and Hyperlipidemia Associated with AMP-Activated Protein Kinase and Glucose Transporter 4 in High-Fat-Fed Mice
Source: MDPI journal article supplement (doi:10.3390/ijms151120022), 2014-11-04
Supplement: s1 [file s1]

# Supplementary Information

## HPLC Analysis

The high-performance liquid chromatographic (HPLC) was performed on a system equipped with HITACHI 7000 system (Shinko, Kobe, Japan) including Autosampler L-7200, L-7400 UV detector, Column oven L-7300 and Interface D-7000. Glycyrrhizin and geniposide were two reference makers applied for HPLC analysis. Chromatographic separation of these two makers was performed on a 5C<sub>18</sub>-AR-II column (4.6ID × 250 mm) maintained at ambient temperature (24 ± 1 °C). The mobile phase of HPLC analysis for glycyrrhizin consisted of a mixture of 2% acetic acid solution and acetonitrile (35:65). The mobile phase of HPLC analysis for geniposide consisted of a mixture of acetonitrile and H<sub>2</sub>O (13:87). The flow rate for HPLC analysis was 1.0 mL/min. The fraction was chromatographed to isolated glycyrrhizin and geniposide were 0.401%, 0.547%, respectively.

Figure S1. BO contained glycyrrhizin.

| D-7000 HPLC System Manager Report |                                                           |             |         |
|-----------------------------------|-----------------------------------------------------------|-------------|---------|
| Analyzed                          | 2014/7/10 02:41:00 PM                                     |             |         |
| Processing Method                 | Gly-2%CH <sub>3</sub> COOH:CH <sub>3</sub> CN = 65:35, 12 |             |         |
| System Name                       | Sys 1                                                     | Series      | 4105    |
| Application                       | Glycyrrhizin                                              | Vial Number | 3       |
| Sample Name                       | Bofu-tsusho-san T103-07-14                                | Vial Type   | UNK     |
| Injection from vial               | 1 of 1                                                    | Volume      | 10.0 µL |

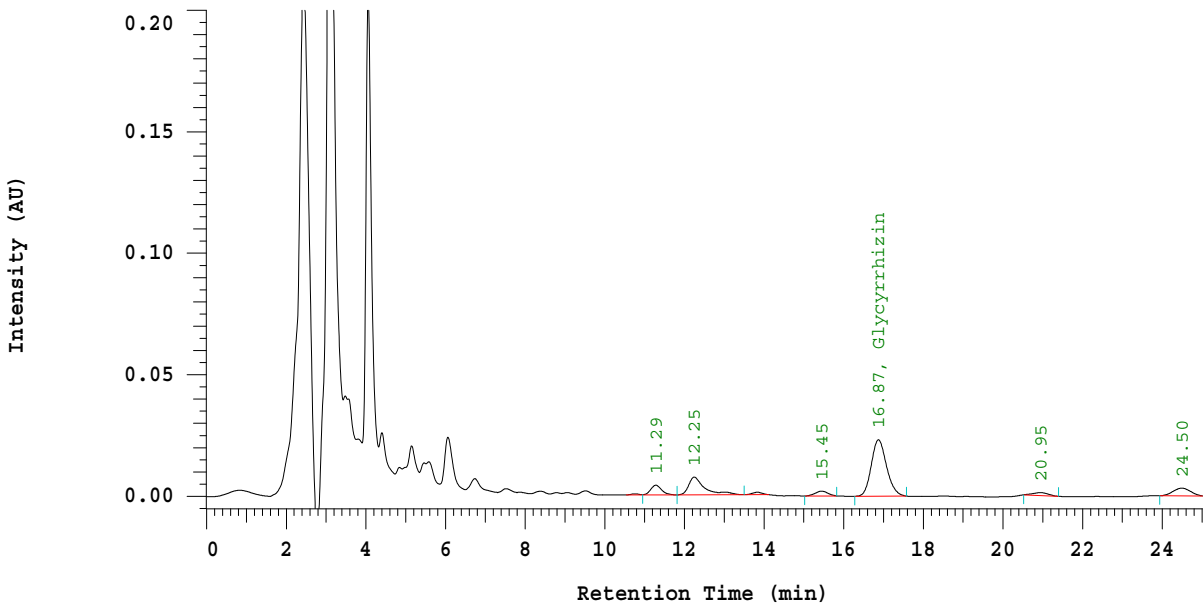

| D-7000 HPLC System Manager Report |                                                           |             |         |
|-----------------------------------|-----------------------------------------------------------|-------------|---------|
| Analyzed                          | 2014/7/10 01:05:00 PM                                     |             |         |
| Processing Method                 | Gly-2%CH <sub>3</sub> COOH:CH <sub>3</sub> CN = 65:35, 12 |             |         |
| System Name                       | Sys 1                                                     | Series      | 4105    |
| Application                       | Glycyrrhizin                                              | Vial Number | 1       |
| Sample Name                       | Glycyrrhizin 0.0546mg/mL                                  | Vial Type   | STD3    |
| Injection from vial               | 1 of 1                                                    | Volume      | 10.0 µL |

Figure S1. Cont.

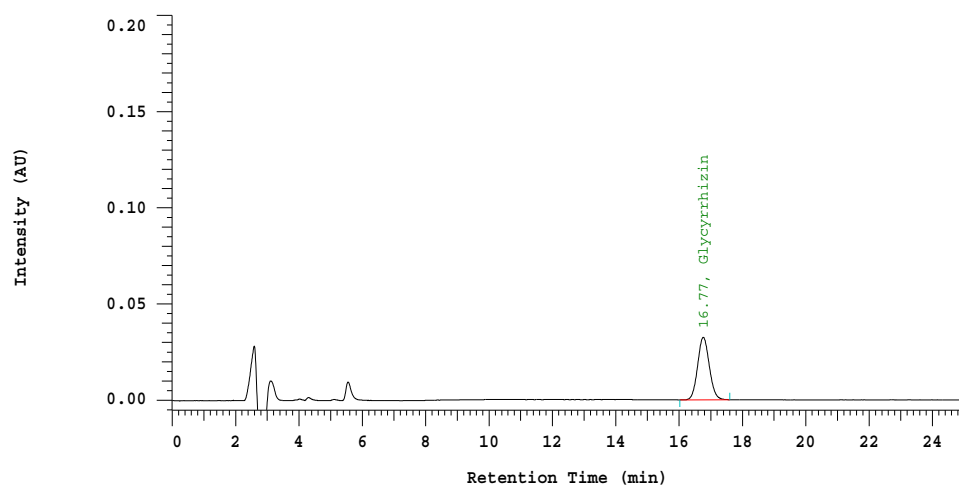

$$\text{Glycyrrhizin} = 305716/414186 \times 0.0546 \times 100/1005.7 \times 1000 = 4.01 \text{ (mg/g)}$$

Figure S2. BO contained geniposide.

| D-7000 HPLC System Manager Report |                            |             |         |
|-----------------------------------|----------------------------|-------------|---------|
| Analyzed                          | 2014/7/10 0:21:00 AM       |             |         |
| Processing Method                 | gep-m12                    |             |         |
| System Name                       | Sys 2                      | Series      | 4040    |
| Application                       | geniposide                 | Vial Number | 3       |
| Sample Name                       | Bofu-tsusho-san T103-07-14 | Vial Type   | UNK     |
| Injection from vial               | 1 of 1                     | Volume      | 10.0 µL |

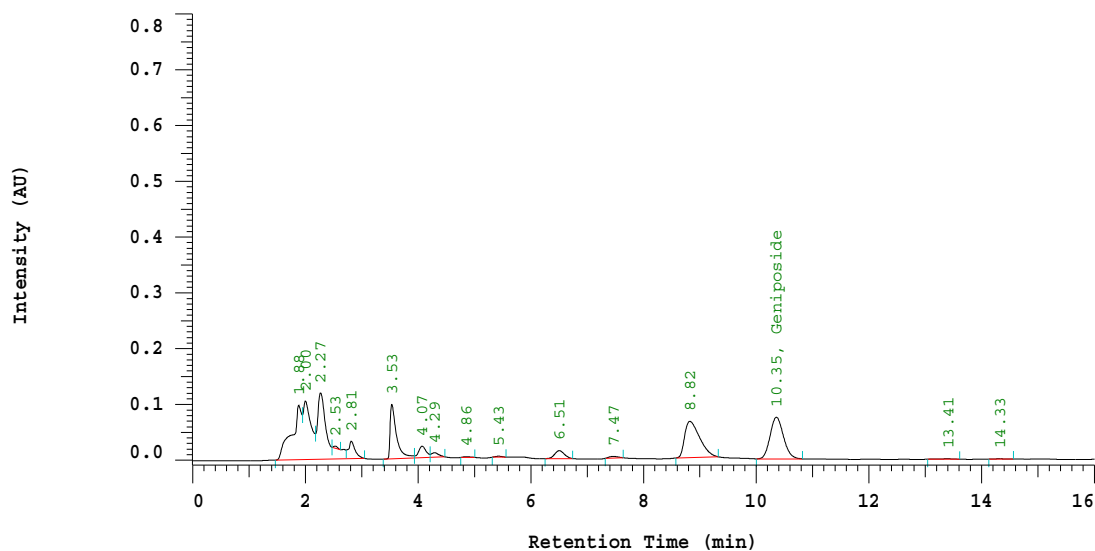

| D-7000 HPLC System Manager Report |                            |             |         |
|-----------------------------------|----------------------------|-------------|---------|
| Analyzed                          | 2014/7/10 10:21:00 AM      |             |         |
| Processing Method                 | gep-m12                    |             |         |
| System Name                       | Sys 2                      | Series      | 4040    |
| Application                       | geniposide                 | Vial Number | 3       |
| Sample Name                       | Bofu-tsusho-san T103-07-14 | Vial Type   | UNK     |
| Injection from vial               | 1 of 1                     | Volume      | 10.0 µL |

Figure S2. *Cont.*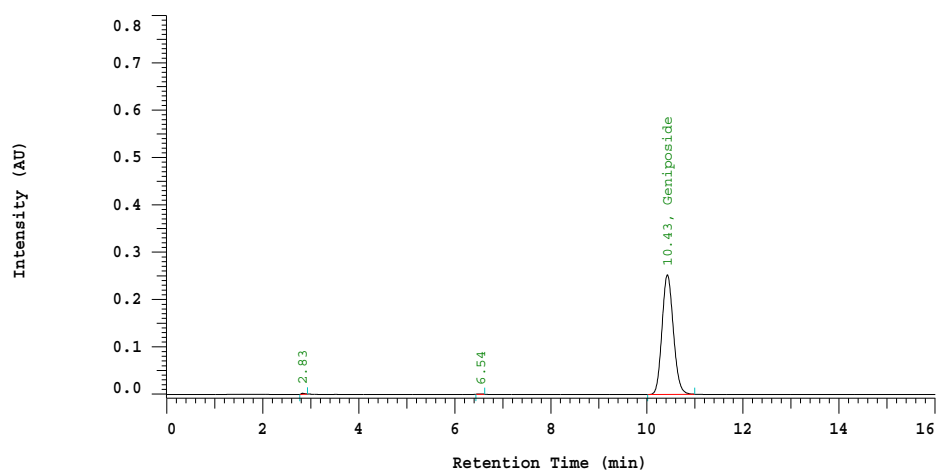

$$\text{Geniposide} = 611233/2068489 \times 0.1862 \times 100/1005.7 \times 1000 = 5.47 \text{ (mg/g)}$$
